# Supplementary material for: Mobile Phone Apps to Support Heart Failure Self-Care Management: Integrative Review
Source: PubMed Central journal article supplement (PMC6834210; doi:10.2196/10057), 2018-05-02
Supplement: cardio_v2i1e10057_app1.pdf [file cardio_v2i1e10057_app1.pdf]

|                                     | Heart Failure Self-Management Components Included |    |    |      |     |     |     |      |      |    |      |       |    |      |    |     |     |
|-------------------------------------|---------------------------------------------------|----|----|------|-----|-----|-----|------|------|----|------|-------|----|------|----|-----|-----|
|                                     | Alert                                             | wt | BP | Symp | Med | Act | Edu | Mood | Supp | MM | Sync | Chart | BG | 6MWT | DB | EKG | BNP |
| Alnosayan (2017) <sup>31</sup>      | X                                                 | X  | X  | X    |     |     |     |      | X    |    |      | X     | X  |      |    |     |     |
| Athilingam (2017) <sup>32</sup>     | X                                                 | X  | X  | X    | X   | X   | X   | X    | X    | X  | X    | X     |    | X    | X  |     |     |
| Austin (2012) <sup>41</sup>         | X                                                 |    |    |      |     |     | X   |      |      | X  |      |       |    |      |    |     |     |
| Bartlett (2014) <sup>33</sup>       |                                                   | X  | X  | X    |     |     |     |      |      |    |      |       |    |      |    |     |     |
| Dang (2017) <sup>40</sup>           | X                                                 | X  | X  | X    |     |     |     | X    | X    |    |      |       |    |      |    |     |     |
| Evans (2016) <sup>43</sup>          |                                                   | X  | X  |      |     | X   | X   |      |      |    | X    |       |    |      |    |     |     |
| Hagglund (2015) <sup>44</sup>       |                                                   | X  | X  |      |     | X   | X   |      |      |    |      |       |    |      |    |     |     |
| Hale (2016) <sup>34</sup>           | X                                                 |    |    |      | X   |     |     |      |      |    |      |       |    |      |    |     |     |
| Pai (2015) <sup>45</sup>            | X                                                 | X  |    | X    | X   | X   | X   |      |      |    | X    |       |    |      |    |     |     |
| Nundy (2013) <sup>35</sup>          |                                                   |    |    |      |     |     | X   |      |      | X  |      |       |    |      |    |     |     |
| Piette (2015) <sup>46</sup>         | X                                                 | X  |    | X    | X   |     |     | X    | X    | X  | X    |       |    |      |    |     |     |
| Portz (2017) <sup>36</sup>          |                                                   | X  |    | X    |     |     |     |      |      |    |      |       |    |      |    |     |     |
| Scherr (2009) <sup>47</sup>         |                                                   | X  | X  |      | X   |     |     |      | X    |    |      |       |    |      |    |     |     |
| Seto (2012) <sup>48</sup>           |                                                   | X  | X  | X    |     |     |     |      |      |    |      | X     |    |      |    | X   |     |
| Suh (2011) <sup>37</sup>            | X                                                 | X  | X  | X    |     | X   |     |      | X    |    | X    | X     |    |      |    |     |     |
| Triantafylidis (2015) <sup>38</sup> |                                                   | X  | X  | X    |     |     | X   |      | X    |    |      | X     |    |      |    |     |     |
| Zan (2015) <sup>39</sup>            |                                                   | X  | X  | X    |     |     |     |      |      |    |      | X     |    |      |    |     |     |
| Zhang (2017) <sup>40</sup>          |                                                   | X  | X  | X    |     | X   |     |      |      | X  |      | X     |    |      |    |     | X   |

**Keys:** Wt: weight; BP: Blood Pressure; Symp: Symptom Assessment; Med: Medication Management; Act: Physical Activity Tracking; Edu: Heart failure Education; Supp: Support communication with family and Providers; MM: Multimedia Message; Sync: Use other Bluetooth device to Sync with Mobile app; Chart: Performance Statistics as Graph; BG: Blood Glucose Monitoring; 6MWT: Six Minute Walk test; DB: Deep Breathing Exercise; EKG: Electrocardiogram; BNP: Brain Natriuretic Peptide
